# Supplementary material
Source: PubMed Central journal article supplement (PMC3061551)
Supplement: NIHMS262738-supplement-ESI.pdf [file NIHMS262738-supplement-ESI.pdf]

## Supplemental Information

# Interplay between manganese and zinc homeostasis in the human pathogen *Streptococcus pneumoniae*<sup>†</sup>

Faith E. Jacobsen,<sup>a</sup> Krystyna M. Kazmierczak,<sup>b</sup> John P. Lisher,<sup>a</sup> Malcolm E. Winkler<sup>b</sup> and David P. Giedroc<sup>a,\*</sup>

**Bacterial strains and growth conditions.** Strains used in this study are listed in Table S1. Bacteria were grown on plates containing trypticase soy agar II (modified; Becton-Dickinson) and 5% (vol/vol) defibrinated sheep blood (TSAll BA) and incubated at 37°C in an atmosphere of 5% CO<sub>2</sub>. Strains were also cultured statically in Becton-Dickinson brain heart infusion (BHI) at 37 °C in an atmosphere of 5% CO<sub>2</sub>, and growth was monitored by OD<sub>620</sub> using a Spectronic 20 spectrophotometer fitted for measurement of capped tubes (outer diameter, 16 mm). Bacteria were inoculated into BHI broth from frozen cultures, serially diluted into the same medium, and propagated overnight. Overnight cultures that were still in exponential phase (OD<sub>620</sub> = 0.1 to 0.3) were diluted back to an OD<sub>620</sub> of ≈0.001 to start final cultures, which did not contain antibiotics.<sup>1</sup> Final cultures were grown in either BHI or BHI containing 200 μM ZnSO<sub>4</sub>. For isotope experiments, bacteria were grown overnight in BHI and then diluted the next morning in BHI spiked with Zn<sup>67</sup> isotope (Isoflex).

**Construction and verification of *S. pneumoniae* mutants.** Strains containing antibiotic markers were constructed by transforming linear DNA amplicons synthesized by overlapping fusion PCR into competent pneumococcal cells as described previously.<sup>2, 3</sup> Primers synthesized for this study are listed in Table S2 of the supplemental material. Transformations were carried out as described before.<sup>4</sup> TSAll BA plates were supplemented as appropriate with the following final concentrations of antibiotics: 250 μg kanamycin per mL, 150 μg streptomycin per mL. All constructs were confirmed by DNA sequencing of the region of interest amplified from genomic DNA, which was prepared from cell lysates (10 μL of culture plus 50 μL of 1x PCR buffer; heated for 10 min at 95°C) and amplified using KOD polymerase (EMD Biosciences). Amplicons were purified using a PCR cleanup kit (Qiagen) and sequenced in reaction mixtures containing 1 μL of Big Dye Terminator reagent (Applied Biosystems) as described previously.<sup>5</sup> Sequences were aligned and analyzed using Vector NTI software (Invitrogen).

**ICP-MS analysis.** 1 mL aliquots of *S. pneumoniae* IU1781 or other strains in exponential phase were centrifuged and washed once with BHI containing 1 mM nitrilotriacetic acid (Aldrich), then twice with PBS that had been treated overnight with chelex (Biorad) according to the manufacturer's protocol. The cell pellets were dried overnight in a rotary evaporator. 400 μL of 2.5% v/v nitric acid (Ultrapure, Sigma-Aldrich) with 0.1% v/v Triton-X 100 were added to solubilize the cell pellets which were then lysed for 10 min at 95 °C with shaking at 500 rpm followed by vigorous vortexing for 20 s. 200 μL of the lysed cell solution (equivalent to 0.5 mL total cell culture) was

added to 1.3 mL of 2.5% v/v nitric acid for ICP-MS analysis. Analyses were performed using a Perkin Elmer ELAN DRCII ICP-MS. The instrument was equipped with a Microflow PFA-ST concentric nebulizer with a 100  $\mu$ L/min self-aspiration capillary, a cyclonic spray chamber, a quartz torch and platinum sampler/skimmer cones. For iron measurements, DRC mode was used with ammonia as the reacting gas. Germanium at 50 ppb was added as an internal standard using an EzyFit glass mixing chamber. Metal concentration per mg protein was determined in the following way. ICP-MS gives [metal] in  $\mu$ g/L \* 0.0015 L sample equals total  $\mu$ g metal in 0.5 mL of cell culture. 20 mL of an IU1781 culture at  $OD_{620}=0.20$  equals  $420 \pm 20$   $\mu$ g total protein<sup>6</sup>; thus 0.5 mL equals 10.5  $\mu$ g and total protein in 0.5 mL of mid-log growth phase cells equals  $52.5 \mu\text{g} \cdot OD_{620}$ , where optical densities used here were in the linear range of detection. An  $OD_{620}=0.20$  is equivalent to  $5.5 \times 10^7$  CFU/mL or  $1.1 \times 10^8$  cells/mL (using 1 CFU=diploid cells). This corresponds to  $2.75 \times 10^8$  cells in 0.5 mL at  $OD_{620}=1.0$  (191  $\mu$ g protein in  $1 \times 10^9$  cells). Thus,  $2.75 \times 10^8$  cells \*  $OD_{620}$  equals the number of cells analyzed in 0.5 mL; using  $0.644 \times 10^{-15}$  L as the cell volume allows determination of the molar metal concentration (see Figure S1). We note that this determination of molar metal concentration is a rough approximation that assumes an identical cell associated volume<sup>7</sup>, an average chain length of two cells for all pneumococcal strains independent of the growth media<sup>6</sup>, and does not distinguish between cytoplasmic and externally bound metal content.

**Microarray analysis.** Bacteria were grown in BHI broth as described<sup>5</sup> but were diluted 100-fold into BHI or BHI with added metals to start final cultures, which were harvested at an  $OD_{620}$  of  $\sim 0.2$ . RNA extraction and purification, cDNA synthesis, labeling and hybridization to *S. pneumoniae* R6 microarrays (Ocimum Biosolutions), array washing and data collection were performed as described previously.<sup>5</sup> Data were collected from three independent biological replicates, including one dye swap, and analyzed using software from the TM4 Microarray Software Suite ([www.tm4.org](http://www.tm4.org)). Results files generated by GenePix Pro 6.0 software (Molecular Devices) were converted to TIGR MultiExperiment Viewer file format using ExpressConverter 2.1 software. Lowess (block) data normalization was performed using TIGR MIDAS 2.21 software. Spots with background signals higher than foreground signals and spots that were flagged as bad by the investigator or MIDAS software were removed from the analysis. Expression ratios and Bayesian *P* values were calculated as described previously.<sup>5</sup> The cutoff for significant changes in relative transcript amounts was set at positive or negative 1.8-fold with a Bayesian *P* value of  $<0.001$ . Intensity and expression ratio data have been deposited in the GEO database ([www.ncbi.nlm.nih.gov/geo/](http://www.ncbi.nlm.nih.gov/geo/); accession no. GSE23504).

**Expression and purification of PsaR.** The *psaR* gene was PCR amplified using primers *psaR001* and *psaR006* from *S. pneumoniae* D39 genomic DNA prepared following the manufacturer's protocol (Master Pure Gram Positive DNA Purification Kit, Epicenter). Primers *psaR001* and *psaR006* introduced BamH1 and Nde1 restriction sites at the ends of the gene (see Table S2). The *psaR* amplicon and pET-3a plasmid DNA were BamHI- and NdeI-digested, treated with alkaline phosphatase, and ligated using standard molecular biology protocols. The resulting pET-3a *psaR* plasmid was transformed into Rosetta quick *E. coli* cells. The PsaR-overproducing strain was grown

in LB media containing both ampicillin (100 µg/mL) and chloramphenicol (37 µg/mL) at 37 °C to an  $OD_{600} = 0.6$ , and induced for protein production with IPTG (0.4 mM) for an additional 2 h of growth. The cells were harvested at 8,000 rpm (11305 x g) for 25 min and stored at -20 °C. Cell pellets were resuspended in lysis buffer (25 mM Tris-HCl, pH 8.0, 500 mM NaCl, 2 mM DTT and 10 mM EDTA). The resuspended cells were lysed by sonication and centrifuged at 13,000 rpm (25,885 x g) for 30 min to remove the cell debris. A 10% PEI solution (0.15% v/v) was added to the supernatant to remove any nucleic acids from solution and allowed to mix for 30 min at 4 °C. The precipitate was removed through centrifugation at 11,000 rpm (18533 x g) for 20 min. Finally, ammonium sulfate cuts (30% and 70%) were done to isolate the fraction containing predominantly PsaR. The dehydrated proteins were pelleted at 11,000 rpm (18533 x g) for 15 min and resuspended in the low salt equilibration buffer (25 mM Tris, pH 8.0, 50 mM NaCl, 5% v/v glycerol, 2 mM DTT, 10 mM EDTA). To remove the remaining ammonium sulfate, the resuspended sample was dialyzed extensively into the low salt buffer. The dialyzed supernatant was loaded onto an anion exchange resin (Q Sepharose, flow rate 1.5 mL/min, NaCl gradient 0.05 – 1 M over 75 min) and PsaR-containing fractions were determined on the basis of SDS-PAGE gels and pooled for further chromatography. The pooled samples were concentrated using Centrifugal Filter Units (Millipore) and applied onto a size exclusion column (Superdex G200, flow rate 1.0 mL/min). PsaR protein was identified in the peaks by SDS-PAGE and analyzed by ESI-MS for purity, and the concentration of protein was calculated using a predicted extinction coefficient of  $11920 \text{ M}^{-1} \text{ cm}^{-1}$  at 280 nm (ProtParam). These pooled fractions were stored at 4 °C.

**DNA binding experiments.** Using the MerMade 4 instrument, two oligonucleotides were synthesized as representative of the reported PsaR operator region (5' – TTCAA AATTAA CTTGAC TTAATT TTT TTT-Flu – 3' and 5' – AAA AAA AATTAA GTCAAG TTAATT TTTGAA – 3') with the first DNA containing the 3' fluorescein (Flu) group for the anisotropy experiment. The oligonucleotides were cleaved using AMA (1:1 methylamine and ammonium hydroxide), ethanol precipitated, and dried overnight in a speedvac. The dried precipitate was resuspended in 500 µL Milli-Q distilled water by heating the mixture to 65 °C. The concentration of the primers was determined by their predicted extinction coefficients of 308,300 and 286,500  $\text{M}^{-1} \text{ cm}^{-1}$  for the fluorescein labeled and unlabeled strands, respectively. The primers were annealed with a slight excess of unlabeled primer by adding the two primers together in the presence of high salt (500 mM NaCl) and heating at 65 °C for 10 minutes. The primers were allowed to cool in the dark for several hours for optimal annealing, and aliquots of the annealed DNA were diluted to approximately 1.5 µM.

Fluorescent anisotropy measurements were performed by using an ISS PC1 spectrofluorometer and exciting the fluorescein at 487 nm. A typical anisotropy experiment was done with 10 nM duplex DNA operator in 50 mM Tris, 100 mM NaCl, 1 mM TCEP, pH 8.0, at 25.0 °C unless noted otherwise. With apo PsaR, 0.5 mM EDTA and 2 mM DTT was added to the cuvette and the protein was kept in the purification buffer to prevent oxidation and occupation of the regulatory sites by metals. For each experiment, an acid washed quartz cuvette was set up with the above conditions for the DNA and the anisotropy measured for each addition of PsaR as the average of five

replicate measurements. The PsaR protein was prepared by adding an excess of divalent metal (Mn(II), Zn(II) or Cd(II)) to the protein, and allowing the protein to equilibrate for at least 20 min before beginning the titration. The resulting data was fitted to a two-step model involving the dimerization of the protein ( $K_{\text{dimer}}$ ), and binding of the dimer to the DNA using Dynafit.  $K_{\text{dimer}}$  was fixed to  $2.0 \times 10^6 \text{ M}^{-1}$  as estimated by an unconstrained fit to the Mn(II)-PsaR titration. Using this model with  $K_{\text{dimer}}$  held constant for all PsaRs, the association constant,  $K_1$ , for the binding of the PsaR dimer to the DNA operator sequence was determined as follows: for apo,  $8.0 \times 10^6 \text{ M}^{-1}$ ; Zn-bound,  $5.0 \times 10^7 \text{ M}^{-1}$ ; Mn-bound,  $6.0 \times 10^8 \text{ M}^{-1}$ ; and Cd-bound,  $2.0 \times 10^9 \text{ M}^{-1}$  (See Fig. 4, main text).

**Table S1.** Strains used in the study <sup>a</sup>

| Strain | Genotype (derivation)                                           | Antibiotic resistance<br><sup>b</sup> | Reference or source |
|--------|-----------------------------------------------------------------|---------------------------------------|---------------------|
| IU1781 | D39 <i>rpsL1</i>                                                | Str <sup>r</sup>                      | 1                   |
| IU2571 | D39 <i>rpsL1 ΔadcR::[kan<sup>R</sup>rpsL<sup>+</sup>]</i>       | Kan <sup>r</sup>                      | 7                   |
| IU2594 | D39 <i>rpsL1 ΔadcR</i>                                          | Str <sup>r</sup>                      | 7                   |
| IU3112 | D39 <i>rpsL1 ΔczcD::[kan<sup>R</sup>rpsL<sup>+</sup>]</i>       | Kan <sup>r</sup>                      | This paper          |
| IU3114 | D39 <i>rpsL1 ΔadcR ΔczcD::[kan<sup>R</sup>rpsL<sup>+</sup>]</i> | Kan <sup>r</sup>                      | This paper          |
|        | D39 <i>rpsL1 ΔmntE::[kan<sup>R</sup>rpsL<sup>+</sup>]</i>       | Kan <sup>r</sup>                      | This paper          |
| IU4024 | D39 <i>rpsL1 ΔmntE</i>                                          | Str <sup>r</sup>                      | This paper          |
| IU4030 | D39 <i>rpsL1 ΔmntE ΔadcR</i>                                    | Str <sup>r</sup>                      | This paper          |
|        | D39 <i>rpsL1 ΔpsaA::[kan<sup>R</sup>rpsL<sup>+</sup>]</i>       | Kan <sup>r</sup>                      | This paper          |
| IU4026 | D39 <i>rpsL1 ΔpsaA</i>                                          | Str <sup>r</sup>                      | This paper          |
| IU4036 | D39 <i>rpsL1 AdcR-H108Q</i>                                     | Str <sup>r</sup>                      | 7                   |

<sup>a</sup> Strains were constructed by transformation of indicated recipients with PCR fragments synthesized by fusion PCR.

<sup>b</sup> Antibiotic resistance markers: Kan<sup>r</sup>, kanamycin; Str<sup>r</sup>, streptomycin

**Table S2.** Primers used in the study

| Primer      | Sequence (5' to 3')                                     | Purpose                                                            |
|-------------|---------------------------------------------------------|--------------------------------------------------------------------|
| FJ czcD 001 | GTCTTTTCAATCTATCTCTGGTGGGGAGAAAG<br>CCTGCAAATTC AAGGGAA | Construction of the $\Delta czcD::[kan^R rpsL^+]$ (Janus) amplicon |
| FJ czcD 002 | TATCCATTA AAAATCAAACGGATCCAACAATG<br>GCATAAGTCAAATTTAAG |                                                                    |
| FJ czcD 003 | CTTAAATTTGACTTATGCCATTGTTGGATCCGT<br>TTGATTTTTAATGGATA  |                                                                    |
| FJ czcD 004 | TTTCGCTTATGGGTTTGGTGGGGCCCCTTTCC<br>TTATGCTTTTGGGA      |                                                                    |
| FJ czcD 005 | TCCAAAAGCATAAGGAAAGGGGCCCCACCAA<br>ACCCATAAGCGAAA       |                                                                    |
| FJ czcD 006 | CATAGTGGAAGCGAATATATTCTGCCTGAAAAT<br>CACCCCCCAAATTATTA  |                                                                    |
| FJ mntE 001 | CAATTTTAAGAGAGTTGGCTTCTATCAAACGTA<br>GGTCCGCTGGTACCAC   | Construction of the $\Delta mntE::[kan^R rpsL^+]$ (Janus) amplicon |
| FJ mntE 002 | CATTATCCATTA AAAATCAAACGGATCCCGAAA<br>TACTGATAATGGCTCC  |                                                                    |
| FJ mntE 003 | GGAGCCATTATCAGTATTTTCGGGATCCGTTTGA<br>TTTTTAATGGATAATG  |                                                                    |
| FJ mntE 004 | GACGCCAGATGGGCCCTTTCCTTATGCTTTTG<br>GACGTTTAG           |                                                                    |
| FJ mntE 005 | CTAAACGTCCAAAAGCATAAGGAAAGGGGCC<br>ATCTGGCGTC           |                                                                    |

|              |                                                         |                                                                                           |                               |
|--------------|---------------------------------------------------------|-------------------------------------------------------------------------------------------|-------------------------------|
| FJ mntE 006  | CTAGATATTGCAACTTTGACAGTCTTAGAGAATT<br>TCTTGCAAGGTTTTG   |                                                                                           |                               |
| FJ mntE 007  | GTTTCGTGGCGACGCCAGATCGAAATACTGAT<br>AATGGCTC            | Construction of $\Delta$ mntE                                                             |                               |
| FJ mntE 008  | GAGCCATTATCAGTATTTTCGATCTGGCGTCGC<br>CACGAAAC           |                                                                                           |                               |
| psaA001      | ATCTTGGGCCTTGACTTCTTTATCGGAGCCATT<br>GTCTTTGGATTGCTAGC  |                                                                                           |                               |
| psaA007      | ATTATCCATTA AAAATCAAACGGATCCAAACCA<br>AGCATTGCCACCTGTTT | Construction of the $\Delta$ psaA::[kan <sup>R</sup> rpsL <sup>+</sup> ] (Janus) amplicon |                               |
| psaA008      | AAACAGGTGGCAATGCTTGGTTTGGATCCGTTT<br>GATTTTTAATGGATAAT  |                                                                                           |                               |
| psaA009      | GTTTTTCAACCAAGGTCTTGATTTGGGGCCCCT<br>TTCCTTATGCTTTTGGGA |                                                                                           |                               |
| psaA010      | TCCAAAAGCATAAGGAAAGGGGCCCAAATCA<br>AGACCTTGGTTGAAAAAC   |                                                                                           |                               |
| psaA004      | GTCATCGTATCGGTTCTATTAGCTATTGTCATCC<br>TTTACAATCTGACCAA  |                                                                                           |                               |
| psaAdelta001 | GATAGAGTCAGTAAAGATTTGTGCAATATCAGC<br>GATTGAGTTTGT       |                                                                                           | Construction of $\Delta$ psaA |
| psaAdelta002 | ACAACTCAATCATCGCTGATATTGCACAAATC<br>TTTACTGACTCTATC     |                                                                                           |                               |
| psaR NdeI    | GGCATATGACCCCAAACAAGAAGACTATCTAA<br>AATGTATTTATGAAATTGG | PsaR Cloning                                                                              |                               |
| psaR BamHI   | CCCCTAGGTAGTTGATTTTCTCGACATAGAGTTG<br>TTTTGCAATGTCC     |                                                                                           |                               |

**Table S3.** Microarray analysis comparing relative transcript amounts from D39 *rpsL1* (IU1781) grown in BHI supplemented with 200  $\mu$ M Zn(II) and in BHI without added Zn(II)<sup>a</sup>

| Gene locus (SPD_/ spr) <sup>b</sup> | Average fold change | Bayesian P value | Description                                                            | Changing in Kloosterman <i>et al</i> <sup>c</sup> |
|-------------------------------------|---------------------|------------------|------------------------------------------------------------------------|---------------------------------------------------|
| 0187/ 0183                          | 2.2                 | 7.5E-06          | <i>nrdD</i> ; Anaerobic rignonucleoside-triphosphate reductase         | Increases                                         |
| 0189/ 0184                          | 1.9                 | 5.1E-04          | Acetyltransferase, GNAT family                                         | Increases                                         |
| 0191/ 0186                          | 2.0                 | 3.2E-04          | Conserved hypothetical protein                                         | Increases                                         |
| 0308/ 0307                          | 1.8                 | 2.3E-05          | <i>clpL</i> ; ATP-dependent Clp protease, ATP-binding subunit          | Decreases                                         |
| 0558/ 0561                          | 6.0                 | 5.0E-10          | <i>prtA</i> ; Cell wall-associated serine protease PrtA                | Increases                                         |
| 0616/ 0622                          | 3.5                 | 3.2E-08          | Amino acid ABC transporter, ATP-binding protein                        |                                                   |
| 0617/ 0623                          | 2.0                 | 6.9E-06          | Amino acid ABC transporter, permease protein                           |                                                   |
| 0618/ 0624                          | 1.9                 | 1.5E-04          | Amino acid ABC transporter, permease protein                           |                                                   |
| 0701/ 0707                          | 1.8                 | 4.3E-05          | <i>ciaR</i> ; DNA-binding response regulator CiaR                      |                                                   |
| 0767/ 0776                          | -1.9                | 1.5E-05          | <i>dacA</i> ; D-alanyl-D-alanine carboxypeptidase                      |                                                   |
| 0775/ 0782                          | 2.7                 | 1.2E-07          | Conserved hypothetical protein                                         | Decreases                                         |
| 0803/ 0810                          | 2.1                 | 3.1E-06          | Conserved hypothetical protein                                         |                                                   |
| 0913/ 0931                          | 2.6                 | 1.5E-07          | Conserved hypothetical protein                                         |                                                   |
| 1461/ 1492                          | 4.2                 | 2.2E-08          | <i>psaB</i> ; Manganese ABC transporter, ATP-binding protein           | Increases                                         |
| 1462/ 1493                          | 3.3                 | 5.7E-08          | <i>psaC</i> ; Manganese ABC transporter, permease protein              | Increases                                         |
| 1463/ 1494                          | 2.9                 | 1.2E-06          | <i>psaA</i> ; Manganese ABC transporter, substrate binding lipoprotein |                                                   |
| 1504/ 1536                          | -1.8                | 7.0E-05          | <i>nanA</i> ; Sialidase A precursor                                    |                                                   |
| 1506/ 1538                          | 1.8                 | 6.4E-05          | <i>axe1</i> ; Acetyl xylan esterase, putative                          |                                                   |
| 1577/ 1612                          | 1.8                 | 2.2E-05          | Conserved hypothetical protein                                         |                                                   |
| no SPD/ 1613                        | 1.8                 | 7.1E-05          | Hypothetical protein                                                   |                                                   |
| 1637/ 1671                          | 10.3                | 1.1E-11          | <i>nmlR</i> ; Transcriptional regulator, MerR family                   | Increases                                         |
| 1638/ 1672                          | 9.8                 | 1.1E-09          | <i>czcD</i> ; Zn, Co, Cd cation efflux system protein                  | Increases                                         |

|            |     |         |                                                   |           |
|------------|-----|---------|---------------------------------------------------|-----------|
| 1643/ 1678 | 2.1 | 8.9E-05 | <i>proV</i> ; Choline transporter                 |           |
| 1717/ 1730 | 2.2 | 1.3E-06 | Membrane protein, putative                        |           |
| 1718/ 1731 | 1.9 | 3.7E-05 | Conserved hypothetical protein                    |           |
| 1871/ 1873 | 2.0 | 6.7E-04 | Conserved hypothetical protein                    |           |
| 1874/ 1875 | 1.9 | 3.6E-05 | LysM domain protein                               |           |
| 1933/ 1917 | 2.8 | 1.0E-05 | <i>malM</i> ; 4- $\alpha$ -glucanotransferase     |           |
| 1965/ 1945 | 2.2 | 8.7E-04 | <i>pcpA</i> ; Choline-binding protein PcpA        | Increases |
| 1990/ 1968 | 1.8 | 3.2E-04 | PTS system, IIC component                         |           |
| 1991/ 1969 | 2.2 | 4.1E-04 | PTS system, IIB component                         |           |
| 1992/ 1970 | 2.5 | 1.1E-03 | PTS system, IIA component                         |           |
| 1993/ 1971 | 3.0 | 3.0E-05 | <i>fucU</i> ; RbsD/ FucU transport protein family |           |
| 1994/ 1972 | 4.5 | 7.9E-10 | <i>fucA</i> ; L-fuculose phosphate aldolase       |           |
| 1995/ 1973 | 3.8 | 2.8E-09 | <i>fcsK</i> ; L-fuculose kinase                   |           |
| 2068/ 2045 | 2.4 | 7.7E-07 | <i>htrA</i> ; Serine protease HtrA                |           |
| 2069/ 2046 | 1.8 | 7.6E-05 | <i>spo0J</i> ; Spo0J protein                      |           |

<sup>a</sup>Microarray analyses were performed as described in Material and Methods. Fold changes are expressed relative to IU1781 grown in BHI without added Zn(II) and are the average of three independent biological replicates, including one dye swap. Changes in relative transcript amounts of positive or negative 1.8 fold with Bayesian P value of <0.001 were considered significant.

<sup>b</sup>SPD\_gene tags refer to strain D39 used in this study. Corresponding spr gene tags for laboratory strain R6 are shown for convenience.

<sup>c</sup>Changes in relative transcript amounts observed for D39 grown in GM17 supplemented with 250  $\mu$ M Zn(II) compared to D39 grown in GM17 without added Zn(II)<sup>7</sup> are shown for comparison.



**Table S4.** Microarray analysis comparing relative transcript amounts from D39 *rpsL1 AdcR-H108Q* (IU4036) grown in BHI supplemented with 200  $\mu$ M Zn(II) and its parent strain D39 *rpsL1 adcR<sup>+</sup>* (IU1781) grown in BHI supplemented with 200  $\mu$ M Zn(II)<sup>a</sup>

| Gene locus (SPD_/_spr) <sup>b</sup> | Average fold change | Bayesian P value | Description                                                                | Changing in $\Delta$ <i>adcR</i> / <i>adcR<sup>+</sup></i> <sup>c</sup> |
|-------------------------------------|---------------------|------------------|----------------------------------------------------------------------------|-------------------------------------------------------------------------|
| 0189/ 0184                          | 1.9                 | 1.1E-03          | Acetyltransferase, GNAT family                                             |                                                                         |
| 0265/ 0262                          | -2.1                | 1.6E-06          | <i>adh</i> ; Alcohol dehydrogenase, zinc-containing                        | Decreases                                                               |
| 0451/ 0445                          | -4.2                | 4.4E-09          | <i>hsdS</i> ; Type I restriction-modification system, S subunit (putative) |                                                                         |
| 0453/ 0448                          | 3.1                 | 1.2E-08          | <i>hsdS</i> ; Type I restriction-modification system, S subunit            |                                                                         |
| 0888/ 0906                          | 13.2                | 8.1E-13          | <i>adcA2</i> ; Putative zinc-binding lipoprotein                           | Increases                                                               |
| 0889/ 0907                          | 65.8                | 7.4E-12          | <i>phtD</i> ; Pneumococcal histidine triad protein D                       | Increases                                                               |
| 0890/ 0908                          | 26.6                | 4.8E-10          | <i>phtE</i> ; Pneumococcal histidine triad protein E                       | Increases                                                               |
| 0891/ 0909                          | 9.9                 | 3.3E-08          | Pneumococcal histidine triad protein, frameshift                           | Increases                                                               |
| 0892/ 0910                          | 21.7                | 7.3E-13          | Pneumococcal histidine triad protein precursor, truncation                 | Increases                                                               |
| 1036/ 1059                          | 1.8                 | 5.7E-04          | Conserved hypothetical protein                                             |                                                                         |
| 1037/ 1060                          | 8.8                 | 9.2E-11          | <i>phpA</i> ; Streptococcal histidine triad protein                        | Increases                                                               |
| 1038/ 1061                          | 4.1                 | 2.1E-04          | <i>phtA</i> ; Pneumococcal histidine triad protein A precursor             | Increases                                                               |
| 1637/ 1671                          | -1.0 <sup>d</sup>   | NA               | <i>nmlR</i> ; Transcriptional regulator, MerR family                       |                                                                         |
| 1638/ 1672                          | -1.0 <sup>d</sup>   | NA               | <i>czcD</i> ; Zn, Co, Cd cation efflux system protein                      |                                                                         |
| 1865/ 1866                          | -13.6               | 1.0E-11          | Alcohol dehydrogenase, zinc-containing                                     | Decreases                                                               |
| 1997/ 1975                          | 8.7                 | 1.5E-11          | <i>adcA</i> ; Zinc ABC transporter, zinc-binding lipoprotein               | Increases                                                               |
| 1998/ 1976                          | 9.5                 | 2.1E-11          | <i>adcB</i> ; Zinc ABC transporter, permease protein                       | Increases                                                               |
| 1999/ 1977                          | 9.6                 | 6.8E-12          | <i>adcC</i> ; Zinc ABC transporter, ATP-binding protein                    | Increases                                                               |
| 2000/ 1978                          | 10.0                | 1.3E-11          | <i>adcR</i> ; <i>adc</i> operon repressor                                  | Increases                                                               |

|            |     |         |                                                                                            |           |
|------------|-----|---------|--------------------------------------------------------------------------------------------|-----------|
| 2017/ 1995 | 2.1 | 1.3E-06 | <i>pspC</i> ; Pneumococcal surface protein C; also called choline binding protein A (CbpA) | Increases |
| 2018/ 1996 | 2.5 | 1.4E-07 | Putative isoprenylcysteine carboxyl methyltransferase family protein                       | Increases |

<sup>a</sup>Microarray analyses were performed as described in Material and Methods. Fold changes are expressed relative to IU1781 grown in BHI with added Zn(II) and are the average of three independent biological replicates, including one dye swap. Changes in relative transcript amounts of positive or negative 1.8 fold with Bayesian P value of <0.001 were considered significant.

<sup>b</sup>SPD\_gene tags refer to strain D39 used in this study. Corresponding spr gene tags for laboratory strain R6 are shown for convenience.

<sup>c</sup>Changes in relative transcript amounts observed for a  $\Delta$ *adcR* mutant grown in BHI compared to its *adcR*<sup>+</sup> parent grown in the same media<sup>8</sup> are shown for comparison.

<sup>d</sup>*nmlR* and *czcD* transcript amounts increased to comparably high levels in the *AdcR*-H108Q mutant and wild-type strains grown in BHI with 200  $\mu$ M Zn(II) (see Table S3).

**Table S5.** Microarray analysis comparing relative transcript amounts from D39 *rpsL1* (IU1781) grown in BHI supplemented with 200  $\mu$ M Zn(II) and 300  $\mu$ M Mn(II) and in BHI without added Zn(II) and Mn(II)<sup>a</sup>

| Gene locus (SPD_ / spr) <sup>b</sup> | Average fold change | Bayesian P value | Description                                                      |
|--------------------------------------|---------------------|------------------|------------------------------------------------------------------|
| 0558/ 0561                           | -2.7                | 3.9E-07          | <i>prtA</i> ; Cell wall-associated serine protease precursor     |
| 0775/ 0782                           | 2.0                 | 8.1E-05          | Conserved hypothetical protein                                   |
| 0913/ 0931                           | 2.4                 | 9.6E-07          | Conserved hypothetical protein                                   |
| 1028/ 1051                           | 1.8                 | 2.7E-04          | <i>acoA</i> ; TPP-dependent acetoin dehydrogenase, alpha subunit |
| 1461/ 1492                           | -3.1                | 8.1E-09          | <i>psaB</i> ; Manganese ABC transporter, ATP-binding protein     |
| 1462/ 1493                           | -3.4                | 2.1E-08          | <i>psaC</i> ; Manganese ABC transporter, permease protein        |
| 1463/ 1494                           | -2.1                | 5.2E-06          | <i>psaA</i> ; ABC transporter, substrate-binding lipoprotein     |
| 1637/ 1671                           | 7.9                 | 3.4E-10          | <i>nmlR</i> ; Transcriptional regulator, MerR family             |
| 1638/ 1672                           | 5.4                 | 1.3E-08          | <i>czcD</i> ; Zn, Co, Cd cation efflux system protein            |
| 2068/ 2045                           | 2.3                 | 8.1E-06          | <i>htrA</i> ; Serine protease HtrA                               |
| 2069/ 2046                           | 2.1                 | 6.7E-06          | <i>spo0J</i> ; Spo0J protein                                     |

<sup>a</sup>Microarray analyses were performed as described in Material and Methods. Fold changes are expressed relative to IU1781 grown in BHI without added Zn(II) and Mn(II) and are the average of three independent biological replicates, including one dye swap. Changes in relative transcript amounts of positive or negative 1.8 fold with Bayesian P value of <0.001 were considered significant.

<sup>b</sup>SPD\_gene tags refer to strain D39 used in this study. Corresponding spr gene tags for laboratory strain R6 are shown for convenience.

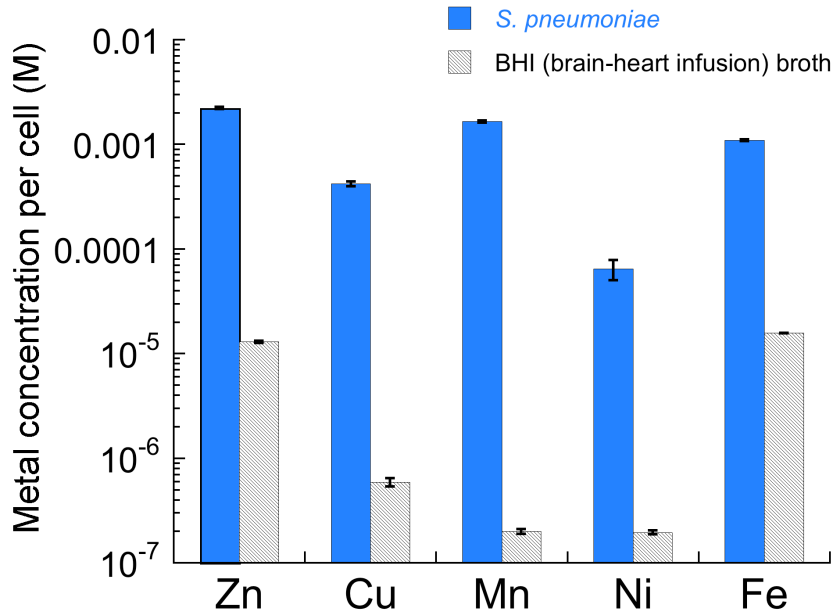

**Figure S1.** ICP-MS analysis of total cell-associated transition metal concentration grown in BHI media compared to the concentrations found in the growth media. The calculations were done assuming an  $OD_{620}=0.2$  is  $5.5 \times 10^7$  CFU/mL or  $1.1 \times 10^8$  cells/mL (one CFU=diploid cells) and a total cell volume of an encapsulated cell to be  $6.44 \times 10^{-16}$  L based on previously determined cell dimensions.<sup>4</sup> We note that these concentrations are  $\approx 5$ - $10$ -fold higher than reported for *E. coli* grown on minimal M9 media<sup>8</sup> and  $\approx 5$ -fold larger than we reported previously for Zn.<sup>9</sup> This correction is due to an estimate of 10 cells per CFU (chain) in the previous work<sup>9</sup> versus 2 cells per CFU used here, which reflects chain dissociation detected during serial dilution.<sup>6</sup> These calculations do not distinguish between cytoplasmic and extracellular metal content.

A

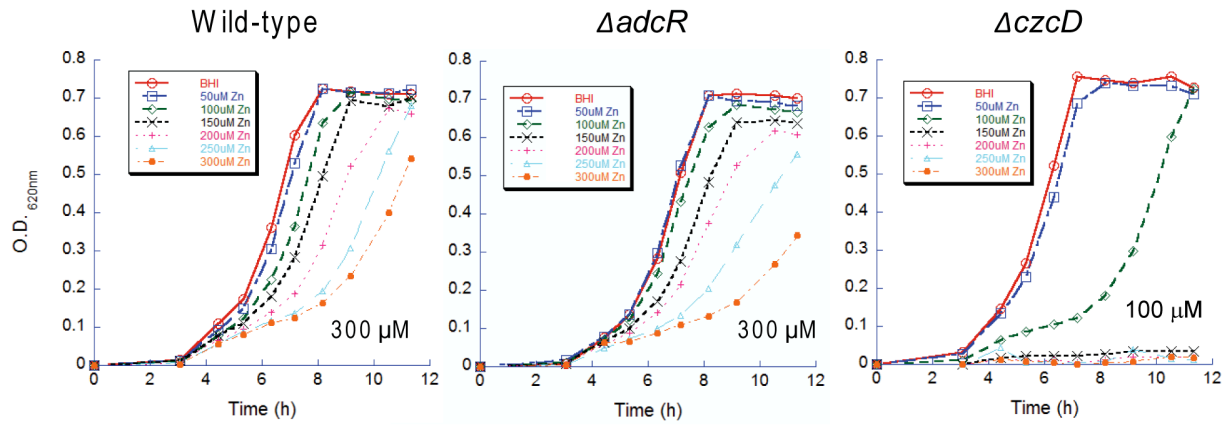

B

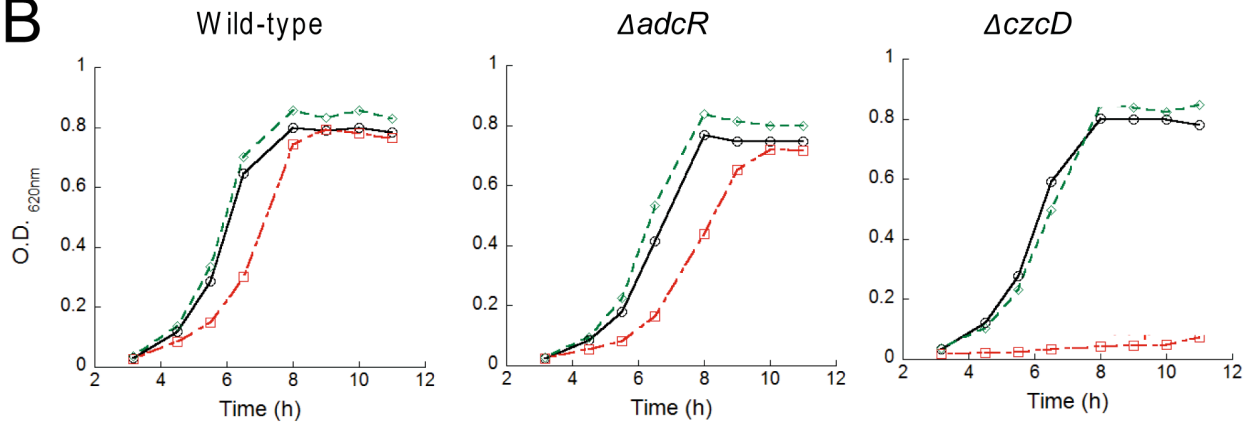

C

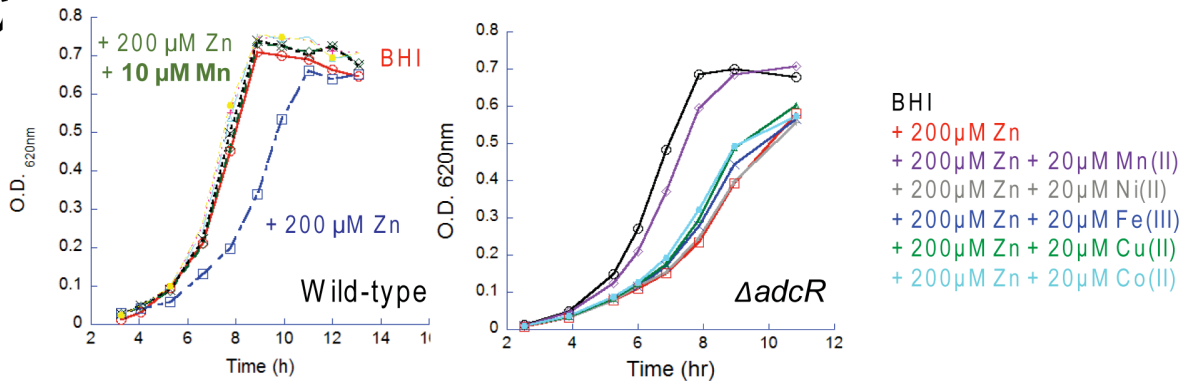

**Figure S2.** A) Growth curves of parent strain (left),  $\Delta adcR$  (middle) and  $\Delta czcD::kan-rpsL$  (right) with increasing zinc added to media. B) Growth of parent strain (left),  $\Delta adcR$  (middle) and  $\Delta czcD::kan-rpsL$  (right) in BHI (black), BHI with 200  $\mu\text{M}$  Zn (red), and BHI with 200  $\mu\text{M}$  Zn and 300  $\mu\text{M}$  Mn (green). C) Growth of parent strain (left) in BHI (red), BHI with 200  $\mu\text{M}$  Zn, and increasing Mn (10  $\mu\text{M}$  to 300  $\mu\text{M}$ ). Growth of  $\Delta adcR$  (right) in BHI (black), BHI with 200  $\mu\text{M}$  Zn (red), and BHI with 200  $\mu\text{M}$  Zn and 20  $\mu\text{M}$  of other transition metals (Mn in purple).

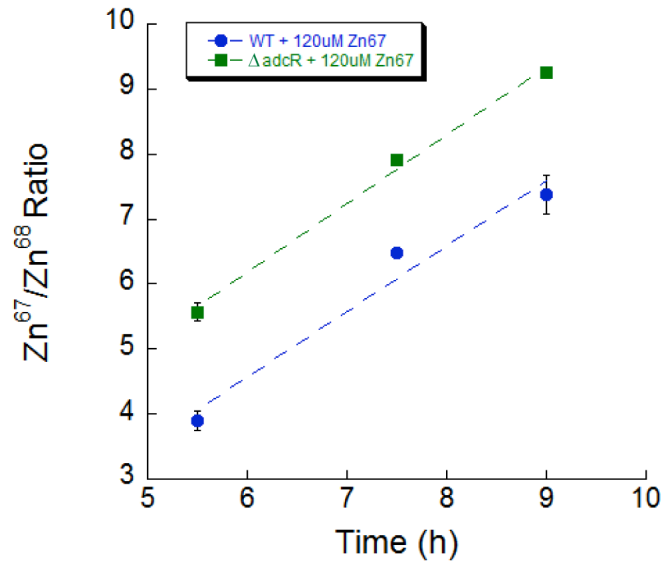

**Figure S3.** Change in Zn<sup>67</sup>/Zn<sup>68</sup> ratio for parent (*blue*, initial OD<sub>620nm</sub> = 0.143) and *ΔadcR* (*green*, initial OD<sub>620nm</sub> = 0.072) over time during the exponential growth phase. See Fig. S2A for comparative growth curves.

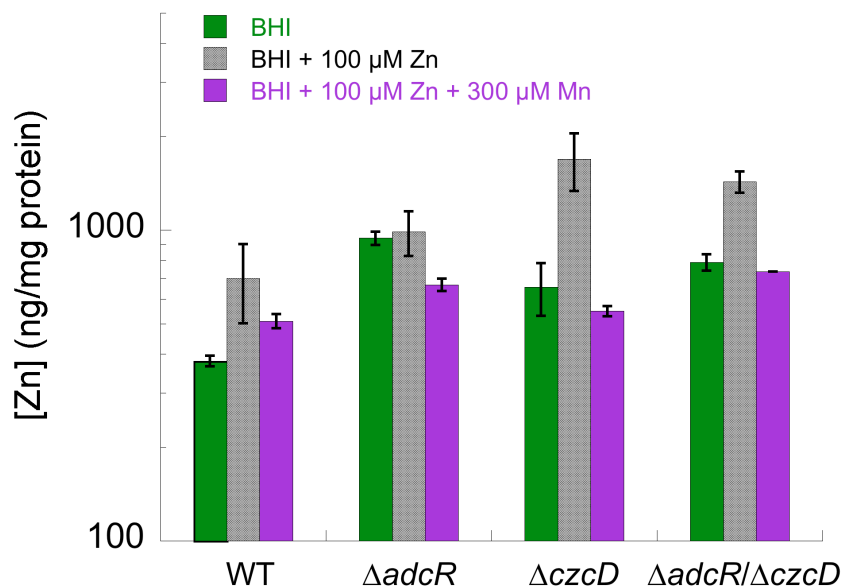

**Figure S4.** Zinc concentration expressed in ng/mg protein of parent WT, *ΔadcR*, *ΔczcD::kan-rpsL* and *ΔadcR ΔczcD::kan-rpsL* strains. *Green* bars represent total cell-associated [Zn] when grown in BHI alone, *gray* bars represent [Zn] when grown in BHI with 100 μM zinc added, while *purple* bars are [Zn] when grown in BHI with 100 μM zinc and 300 μM manganese added.

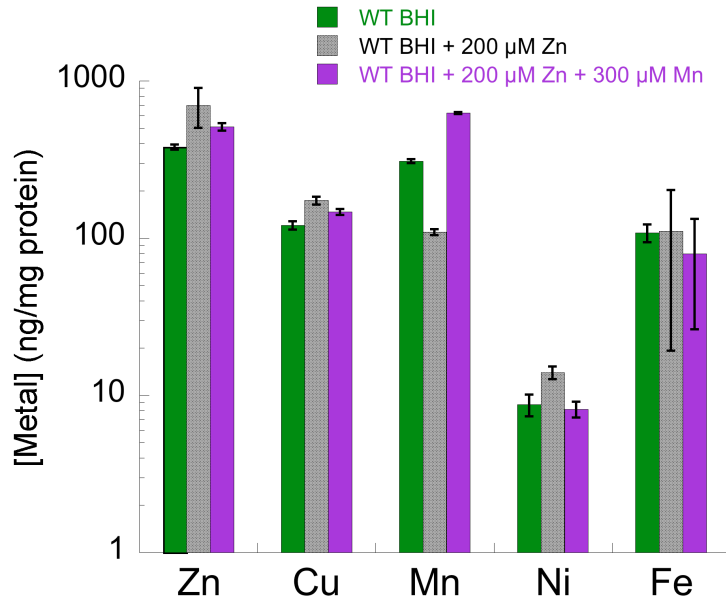

**Figure S5.** Transition metal concentrations expressed as ng metal/mg protein for parent wild-type strain grown in BHI (*green*), BHI with 200  $\mu\text{M}$  zinc (*black dash*), and BHI with 200  $\mu\text{M}$  zinc and 300  $\mu\text{M}$  manganese (*magenta*).

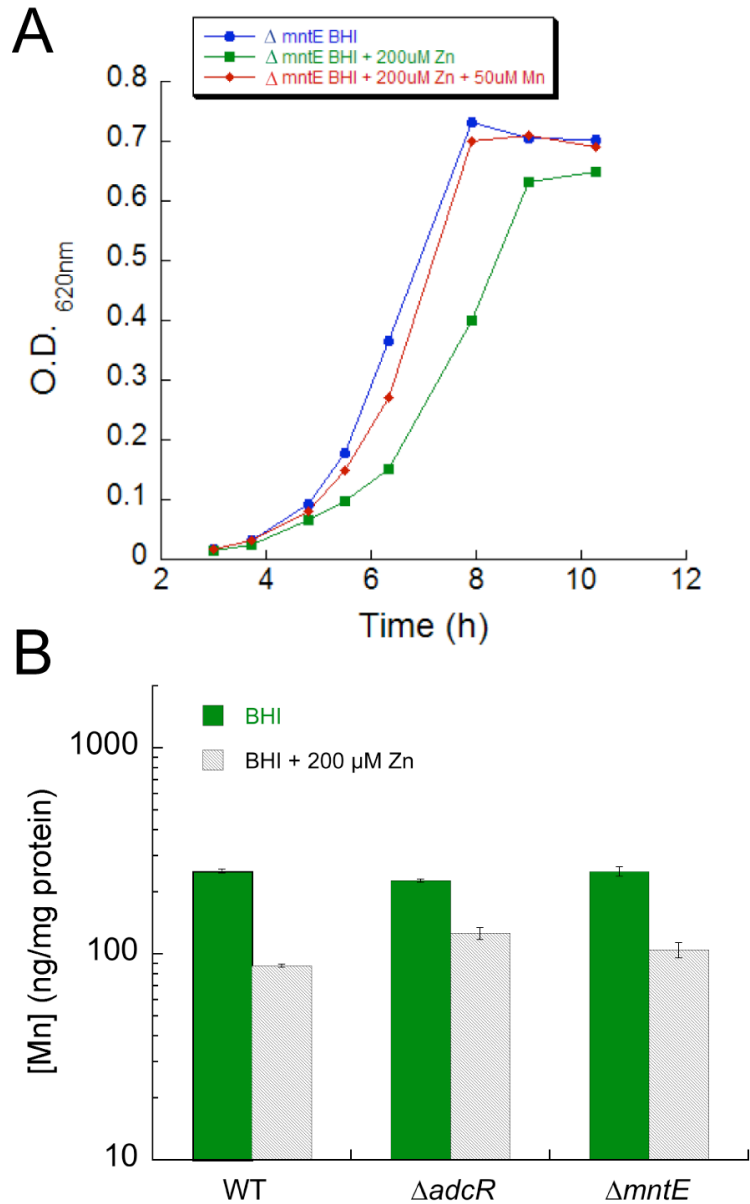

**Figure S6.** A) Growth curve for  $\Delta mntE$  strain grown in BHI (blue), BHI + 200  $\mu$ M Zn (green), and BHI + 200  $\mu$ M Zn + 50  $\mu$ M Mn. B) Manganese concentrations parent strain,  $\Delta adcR$ , and  $\Delta mntE$  strains grown in BHI (green bars) and BHI with 200  $\mu$ M zinc (gray bars).



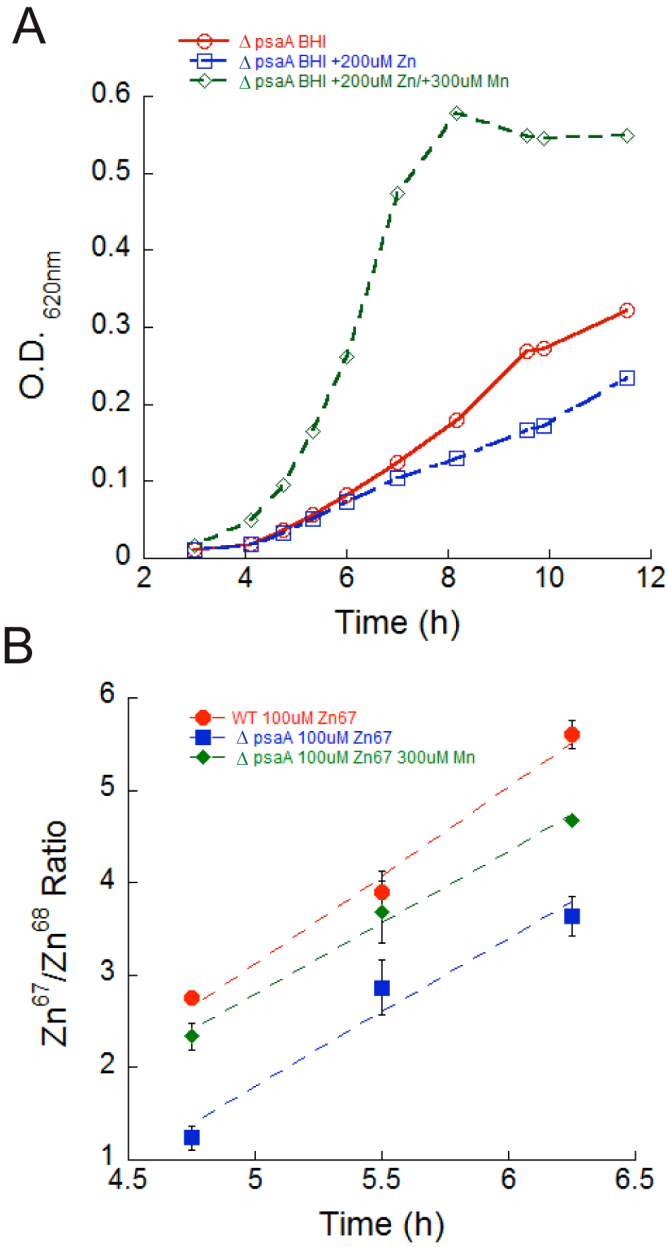

**Figure S7.** (A) Growth curves for  $\Delta$ psaA strain in BHI alone (red symbols), BHI plus 200  $\mu$ M added Zn (blue symbols) and BHI plus 200  $\mu$ M Zn and 300  $\mu$ M Mn (green symbols). (B) Change in Zn<sup>67</sup>/Zn<sup>68</sup> ratio for wild-type parent strain grown in 100  $\mu$ M Zn<sup>67</sup> (red symbols, initial OD<sub>620nm</sub> = 0.087),  $\Delta$ psaA strain grown in 100  $\mu$ M Zn<sup>67</sup> (blue, initial OD<sub>620nm</sub> = 0.057), and  $\Delta$ psaA grown in 100  $\mu$ M Zn<sup>67</sup> and 300  $\mu$ M Mn (green, initial OD<sub>620nm</sub> = 0.093).

## References

1. S. Ramos-Montañez, H.-C. T. Tsui, K. J. Wayne, J. L. Morris, L. E. Peters, F. Zhang, K. M. Kazmierczak, L.-T. Sham and M. E. Winkler, *Mol. Microbiol.*, 2008, **67**, 729-746.
2. G. T. Robertson, W.-L. Ng, J. Foley, R. Gilmour and M. E. Winkler, *J. Bacteriol.*, 2002, **184**, 3508-3520.
3. W.-L. Ng, G. T. Robertson, K. M. Kazmierczak, J. Zhao, R. Gilmour and M. E. Winkler, *Mol. Microbiol.*, 2003, **50**, 1647-1663.
4. S. M. Barendt, A. D. Land, L.-T. Sham, W.-L. Ng, H.-C. T. Tsui, R. J. Arnold and M. E. Winkler, *J. Bacteriol.*, 2009, **191**, 3024-3040.
5. J. A. Lanie, W.-L. Ng, K. M. Kazmierczak, T. M. Andrzejewski, T. M. Davidsen, K. J. Wayne, H. Tettelin, J. I. Glass and M. E. Winkler, *J. Bacteriol.*, 2007, **189**, 38-51.
6. S. Ramos-Montañez, K. M. Kazmierczak, K. L. Hentchel, and M. E. Winkler, *J. Bacteriol.*, 2010, *in press* (doi:10.1128/JB.00995-10).
7. T. G. Kloosterman, R. M. Witwicki, M. M. van der Kooi-Pol, J. J. E. Bijlsma and O. P. Kuipers, *J. Bacteriol.*, 2008, **190**, 5382-5393.
8. C. Outten and T. O'Halloran, *Science*, 2001, **292**, 2488-2492.
9. H. Reyes-Caballero, A. J. Guerra, F. E. Jacobsen, K. M. Kazmierczak, D. Cowart, U. M. K. Koppolu, M. E. Winkler and D. P. Giedroc, *J. Mol. Biol.*, 2010, **403**, 197-216
